# Supplementary material for: CRISPR/Cas9-Mediated Knock-Out of the MtCLE35 Gene Highlights Its Key Role in the Control of Symbiotic Nodule Numbers under High-Nitrate Conditions
Source: MDPI journal article supplement (doi:10.3390/ijms242316816), 2023-11-27
Supplement: s1 [file s1]

A

### *MtCLE35* CDS (279 bp)

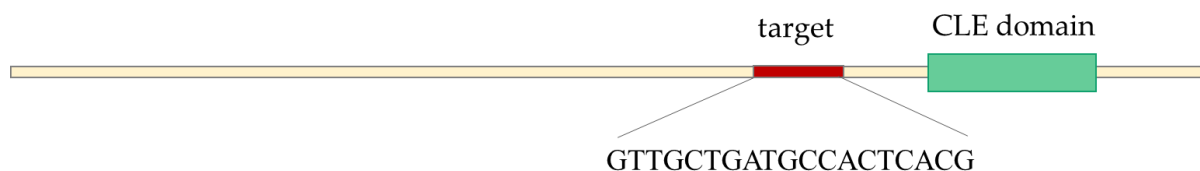

B

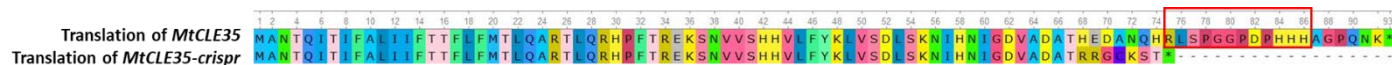

| T0 plant ID<br>(№/sample ID) |     | In/del                      |
|------------------------------|-----|-----------------------------|
| 1                            | #1  | +1(G)/ +1(C)                |
| 2                            | #2  | -15/+1                      |
| 3                            | #4  | deletions of various length |
| 4                            | #6  | +1/-3                       |
| 5                            | #8  | deletions of various length |
| 6                            | #9  | -4/-3                       |
| 7                            | #10 | -15                         |
| 8                            | #11 | -20/-1                      |
| 9                            | #12 | -4/-5                       |
| 10                           | #13 | +1/-2                       |
| 11                           | #14 | deletions of various length |
| 12                           | #15 | -1/-5                       |
| 13                           | #16 | 0 (wild type)               |
| 14                           | #17 | +1(G)/ +1(C)                |
| 15                           | #18 | -20/-1                      |
| 16                           | #19 | 0 (wild type)               |
| 17                           | #20 | -1/-5                       |
| 18                           | #21 | +1/-2                       |
| 19                           | #25 | -5/-1                       |
| 20                           | #27 | -20/-1                      |

**Supplementary Table S1. Genotypes of T0 plants obtained after transformation with the construct for CRISPR/Cas9-mediated editing of the *MtCLE35* gene.** The data are obtained based on the analysis of sequencing chromatogram for the *MtCLE35* gene using Synthego ICE tool. For two plants, #16 and #19, no editing events were found (wild type genotype). In/del – insertions and deletions within the *MtCLE35* CDS, negative numbers correspond to the length of deletions in bp, +1 corresponds to 1 bp insertion. Three plants (#4, #8, #14) had deletions of various length according to Synthego ICE analysis indicating multiallelic changes in the *MtCLE35* gene in these plants.

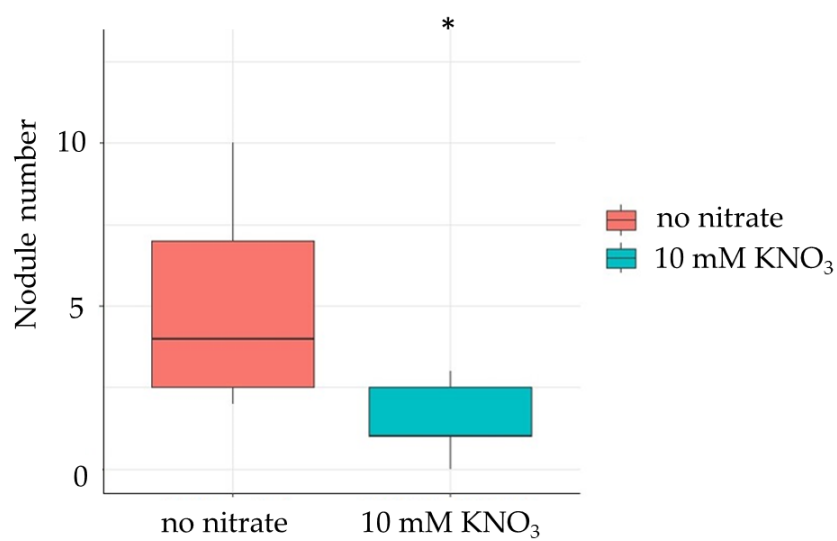

**Supplementary Figure S2.** Number of nodules at 28 dpi in wild-type plants (R108) grown without nitrate and in presence of 10 mM KNO<sub>3</sub>. \*  $p < 0.05$  (wilcoxon test,  $n = 15$ ).
